# Supplementary material for: Historical Nitrogen Fertilizer Use in Agricultural Ecosystem of theContinental United States during 1850–2015: Application rate,Timing, and Fertilizer Types
Source: Copernicus journal article supplement (doi:10.5194/essd-2017-132), 2017-12-18
Supplement: Supplementary file 1 [file essd-2017-132-supplement.pdf]

Supplementary information for

**“Historical Nitrogen Fertilizer Use in Agricultural Ecosystem of the Continental U.S. during 1850-2015: Application, Timing, Fertilizer Type”**

Peiyu Cao<sup>1</sup>, Chaoqun Lu<sup>1</sup>, Zhen Yu<sup>1</sup>

<sup>1</sup>*Department of Ecology, Evolution, and Organismal Biology, Iowa State University, Ames, IA, 50011*

**1 Historical state-level farm-used N consumption**

We harmonized the state-level farm-used N fertilizer consumption from Mehring et al. (1957) for period of 1930-1953, USDA (1971) for period of 1954-1969, USDA (1977) for the year 1976 and 1977, and Brakebill and Gronberg (2012) for period of 1987-2012 (Table S1).

Supplementary table S1. Data sources for state-level farm-used N consumption

| Data sources                  | Period    |
|-------------------------------|-----------|
| Mehring et al. (1957)         | 1930-1953 |
| USDA (1971)                   | 1954-1969 |
| USDA (1977)                   | 1976-1977 |
| Brakebill and Gronberg (2012) | 1987-2012 |

**2 Historical national average crop-specific N use rate**

National average crop-specific N rates were derived from Mehring et al. (1957), USDA (1957), Ibach et al. (1964), Ibach and Adams (1967), USDA-ERS (2013), and USDA-NASS (2017). Crop types fertilized were reported differently between these data sources. In Mehring et al. (1957), N used in seven crop types were recorded, including corn, soybeans, wheat (sum of N used in spring wheat, winter wheat, and durum wheat), cotton, rice, barley, and cropland pasture. While in

comparison, USDA (1957), Ibach and Adams (1967), and USDA-ERS (2013) provided N use in all nine major crops during 1954 to 1964, including three wheat types and cropland pasture. For the period of 1964 to 2015, USDA reported all nine major crops without cropland pasture. In addition, crop-specific N use documented in Mehring et al. (1957) is the sum of N, P, K, and trace nutrient fertilizers (Table S2).

Supplementary table S2. Data sources for national average crop-specific N use rate

| Data sources                     | Period                       | Crop types      | Data form                    |
|----------------------------------|------------------------------|-----------------|------------------------------|
| Mehring et al. (1957)            | 1927, 1938, 1942, 1946, 1950 | 7 <sup>a</sup>  | Total fertilizer consumption |
| USDA (1957)                      | 1954                         | 10 <sup>b</sup> | N use rate                   |
| Ibach et al., (1964)             | 1959                         | 10 <sup>b</sup> | N use rate                   |
| Ibach and Adams. (1967)          | 1964                         | 10 <sup>b</sup> | N use rate                   |
| USDA-ERS (2013) and -NASS (2017) | 1965-2015                    | 9 <sup>c</sup>  | N use rate                   |

The number of crop types recorded in different sources varied. <sup>a</sup>, crop types included corn, soybeans, wheat (spring wheat, winter wheat, and durum wheat in total), cotton, rice, barley, and cropland pasture. <sup>b</sup>, crops included all nine major crops and cropland pasture. <sup>c</sup>, crops only included nine major crops but not cropland pasture. Total fertilizer of each crop type reported in Mehring et al. (1957) contained all N, P, K, and trace fertilizers.

### 3 Application timing

N fertilizer application timing information was derived from the survey conducted by USDA-ERS (2016). The survey started from 1996, and collected the data periodically for each crop in each state (Table S3). The survey years of different crop types may vary. For example, corn plantings were surveyed in 1996-2001, 2005, and 2010, while soybean plantings were surveyed in 1996-2000, 2002, 2006, and 2012. Moreover, the survey year of a specific crop type in different states may also vary. We adopted the latest surveyed years for each of the all nine crops. For the latest surveyed year, USDA-ERS (2016) only reported the average application timings at all survey states for sorghum (year 2011) and rice (year 2013). We therefore used the prior surveyed years to generate state-level application timings for sorghum and rice (Table S3).

Supplementary table S3. The survey years of application timing we adopted for nine crops

| Crops        | Survey years                             |
|--------------|------------------------------------------|
| Corn         | 1996-2001, 2005, <b>2010</b>             |
| Soybeans     | 1996-2000, 2002, 2006, <b>2012</b>       |
| Winter Wheat | 1996-1998, 2000, 2004, <b>2009</b>       |
| Spring Wheat | 1996-1998, 2000, 2004, <b>2009</b>       |
| Cotton       | 1996-2000, 2003, <b>2007</b>             |
| Sorghum      | <b>2003</b> , 2011 (Average timing only) |
| Rice         | <b>2006</b> , 2013 (Average timing only) |
| Barley       | <b>2011</b>                              |
| Durum Wheat  | 1996-1998, 2000, 2004, <b>2009</b>       |

The years with bold font were the survey years we mostly adopted for each crop in this study. But the specific year of a given state may vary due to the different survey schedule in every states. The reported application timings data for sorghum and rice in their latest surveyed years were average over all surveyed states.

#### 4 Reconstruct historical national consumption of 11 N fertilizer types

Historical national consumption of 11 N fertilizers from 1900 to 2011 were collected from Mehring et al. (1957), USDA (1966), USDA-ERS (2013), and FAO (2017) (Table S4). We assume the fraction of  $\text{NH}_4^+\text{-N}$  and  $\text{NO}_3^-\text{-N}$  remained unchanged before 1900 because the commercial N fertilizer was mainly extracted from organic products and mineral deposits (Sheridan, 1979). Diammonium Phosphate (DAP) and Monoammonium Phosphate (MAP) were not reported during 1900-1960 due to their consumption were relatively small and were incorporated in Ammonium Phosphates (APs). After 1960, however, the consumption of these two fertilizers increased to very high amount and were reported separately.

Supplementary table S4. Data sources used to reconstruct historical consumption record of 11 N fertilizers across nation

| Fertilizers | AnA | AqA | AN | AS | NS | SN | Urea | CN | DAP | MAP | APs |  |
|-------------|-----|-----|----|----|----|----|------|----|-----|-----|-----|--|
| 1900-1953   |     |     |    |    |    |    |      |    | \   | \   |     |  |
| 1954-1959   |     |     |    |    |    |    |      | \  | \   | \   |     |  |
| 1960-2003   |     |     |    |    |    |    |      |    |     |     |     |  |
| 2004-2011   |     |     |    |    |    |    |      |    |     |     |     |  |

## 5 Data sources for state-level N consumption of 11 single N fertilizer types

Supplementary table S5. Data sources used to reconstruct historical state-level consumption of 11 N fertilizers

1996

2006

2012

Green: USDA. (1966). Orange: USDA (1971). Purple: USDA (1977). Blue: AAPFCO (1986, 1996, 2006, and 2012). AnA: Anhydrous Ammonium. AqA: Aqua Ammonium. AN: Ammonium Nitrate. AS: Ammonium Sulfate. NS: Nitrogen solution. SN: Sodium Nitrate. CN: Calcium Nitrate. DP: Diammonium Phosphate. MP: Monoammonium Phosphate. Aps: The integration of Ammonium Phosphates

## 6 Estimating the ratio of application timings for 11 single N fertilizer types

Due to the physical and chemical differences between N fertilizer types, applying N fertilizers at specific timings can enhance crop production and reduce N loss. To assign consumption of each N fertilizer type into four application timings, namely, Fall (previous year), Spring (before planting), At planting, and after planting, we took the Agronomy Guide of applicatoin timings (Mengel et al., 2017) as reference (Table S6). We set the N use ratio for timing classified as Unadapted in Guide as zero. N ratio in other timings were assigned value according to the relative priority of Poor, Good, and Excellent. Take Ammonium Nitrate as an example, the ratios of Fall, Spring, At planting, and After planting were assigned as 0, 0.2, 0.4, and 0.4, respectively. Nevertheless, the practical situation may different to the Guide due to the use of nitrification inhibitors and vriations in seasonal fertilizer price. We further made adjustments for the timing ratios according to the survey from Bierman et al. (2012).

Supplementary table S6. Agronomy Guide of application timings for 11 N fertilizer types (Mengel et al., 2017)

| Fertilizer Material    | Fall      | Spring    | At planting | After planting |
|------------------------|-----------|-----------|-------------|----------------|
| <b>Dry Solid Forms</b> |           |           |             |                |
| Ammonium Nitrate       | Unadapted | Good      | Excellent   | Excellent      |
| Ammonium Sulfate       | Excellent | Excellent | Excellent   | Good           |
| Sodium Nitrate         | Unadapted | Good      | Excellent   | Excellent      |
| Urea                   | Excellent | Excellent | Excellent   | Good           |
| Calcium Nitrate        | Unadapted | Good      | Excellent   | Excellent      |
| Diammonium Phosphate   | Excellent | Excellent | Excellent   | Excellent      |
| Monoammonium Phosphate | Excellent | Excellent | Excellent   | Excellent      |
| Ammonium Phosphates    | Excellent | Excellent | Excellent   | Excellent      |

| <b>Liquid Forms</b>                                                                                                                                                                 |           |           |           |           |
|-------------------------------------------------------------------------------------------------------------------------------------------------------------------------------------|-----------|-----------|-----------|-----------|
| Anhydrous Ammonia                                                                                                                                                                   | Excellent | Good      | Excellent | Unadapted |
| Aqua Ammonia                                                                                                                                                                        | Excellent | Good      | Excellent | Unadapted |
| Nitrogen Solutions                                                                                                                                                                  | Poor      | Excellent | Excellent | Unadapted |
| Sodium Nitrate and Monoammonium Phosphate were not listed in the original guide, we assumed they were suggested the same as Calcium Nitrate and Diammonium Phosphate, respectively. |           |           |           |           |

## 7 Comparison of national crop-specific application timing ratio between Wade et al., (2015) and this study

We estimated the application timing ratio based on the survey from USDA-ERS (2016). We further compared our results with the national application timing ratio of corn, cotton, spring wheat, and winter wheat reported by Wade et al. (2015). The differences between our study and Wade et al. (2015) are relatively small (0-6 %), with the largest difference found in after-planting cotton (6%) (Table S7).

Supplementary table S7. Comparison of national application timing percentage of corn, cotton, spring wheat, and winter wheat from Wade et al. (2015) and this study, respectively.

| Application timing  | Wade et al. (2015) (%) | This study (%) | Difference (%) |
|---------------------|------------------------|----------------|----------------|
| Fall-corn           | 20                     | 18             | 2              |
| Fall-cotton         | 7                      | 8              | 1              |
| Fall-spring wheat   | 21                     | 22             | 1              |
| Fall-winter wheat   | 36                     | 36             | 0              |
| Spring-corn         | 50                     | 50             | 0              |
| Spring-cotton       | 28                     | 31             | 3              |
| Spring-spring wheat | 42                     | 43             | 1              |
| Spring-winter wheat | 5                      | 5              | 0              |
| After planting-corn | 22                     | 23             | 1              |
| After-cotton        | 59                     | 53             | 6              |
| After-spring wheat  | 5                      | 6              | 1              |

---

Fall refers to the fall in previous year. Spring refers to the time before planting. Difference is the absolute difference between Wade et al. (2015) and this study.

## 8 Reconstructing historical state-level N consumption of 11 fertilizer types

Due to the lack of annual state-level N use of 11 major N fertilizer types from 1850 to 2015, we utilized the state-level N use of the mid-decade year (every sixth year in a decade) as reference to infer the state-level N use of 11 N fertilizers in the decade. We calculated the percentage of each N fertilizer type consumed by a given state to all states and analyzed the interannual variation of this percentage during 1963 to 1969 to verify the representative of 1966 for other years in the 1960s. Here only the percentage of Anhydrous Ammonia (AnA), Ammonium Nitrate (AN), Nitrogen Solution (NS), and Urea (Figure S1) were showed, accounting for 83% of the total 11 N fertilizers consumption.

The interannual variation of percentage for most states is relatively small within 7 years (Figure S1). The percentages of some states showed larger fluctuations but in reasonable ranges. The few largest interannual changes were found in Iowa for AnA ( $13.3\pm 3.1\%$ ), Missouri for AN ( $5.4\pm 1.6\%$ ), Illinois for NS ( $8.6\pm 2.4\%$ ), and Indiana for Urea ( $5.2\pm 1.9\%$ ).

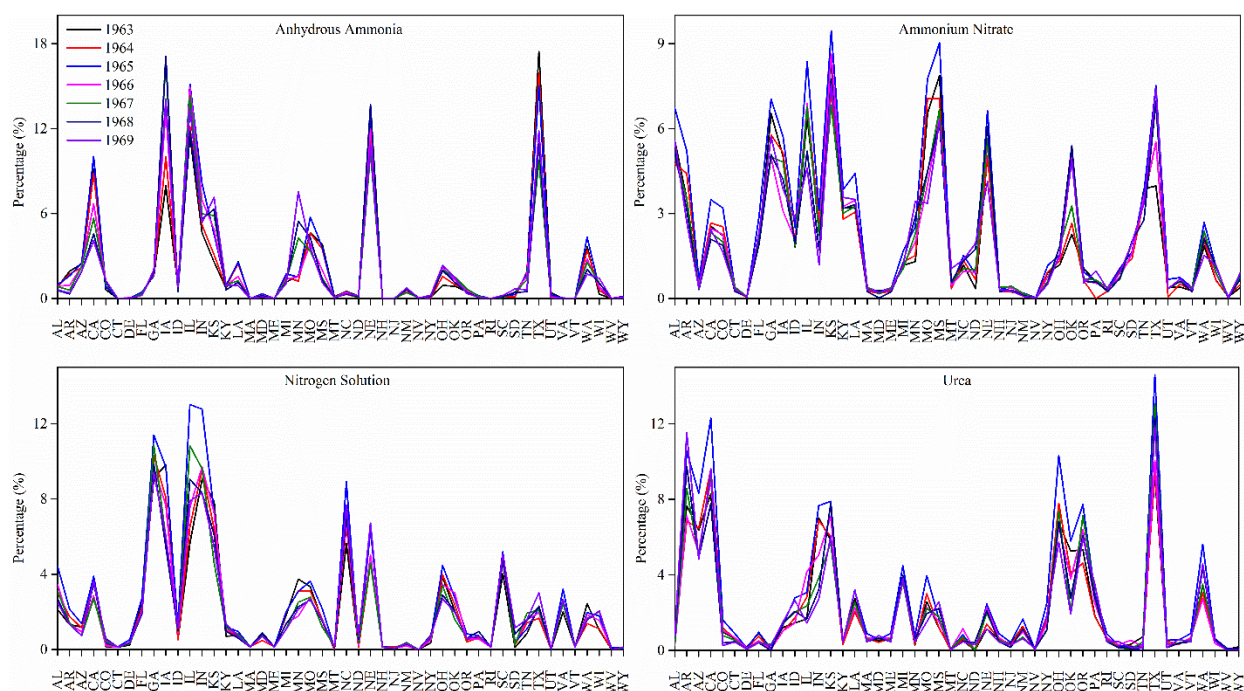

Supplementary figure S1. Proportion of state-level Anhydrous Ammonia and Ammonium Nitrate fertilizer use to national total consumption in a few selected years.

## 9 Fraction of N fertilizer use rate in application timing to total N use rate in 2015

To explore the N use characteristics at different application timings across the continental U.S., we divided the total N use rate by N use rate of each application timing and generated the fraction of N use at four timings in 2015 (Figure S2). Most regions, such as the Northwest, the east of the Northern Great Plains, the Midwest, the Southeast, and the Northeast applied the majority of N fertilizer in spring and after planting ( $>40\%$ ) (Figure S2b&d). Meanwhile, farmers in some regions preferred applying N fertilizer in fall or at planting due to the late growth season of some specific crop types or the habits of fertilizer use. For example, the winter wheat in the Southern Great Plains and the north of the Northwest received most of fall-applied N fertilizer (Figure S2a), which is equivalent to fertilizer use before planting for other crops, and contributed to the rise of winter wheat yield (Mahler et al., 1994). Moreover, corn and soybeans in Minnesota, Iowa, and Michigan in the Midwest received over 30% of annual N in fall, which may be related to the lower fertilizer price and favorable weather and soil conditions in the season (Dinnes et al., 2002). In comparison, N fertilizer uses for spring wheat and barley were only found at-planting in Montana and Wyoming (Figure S2c).



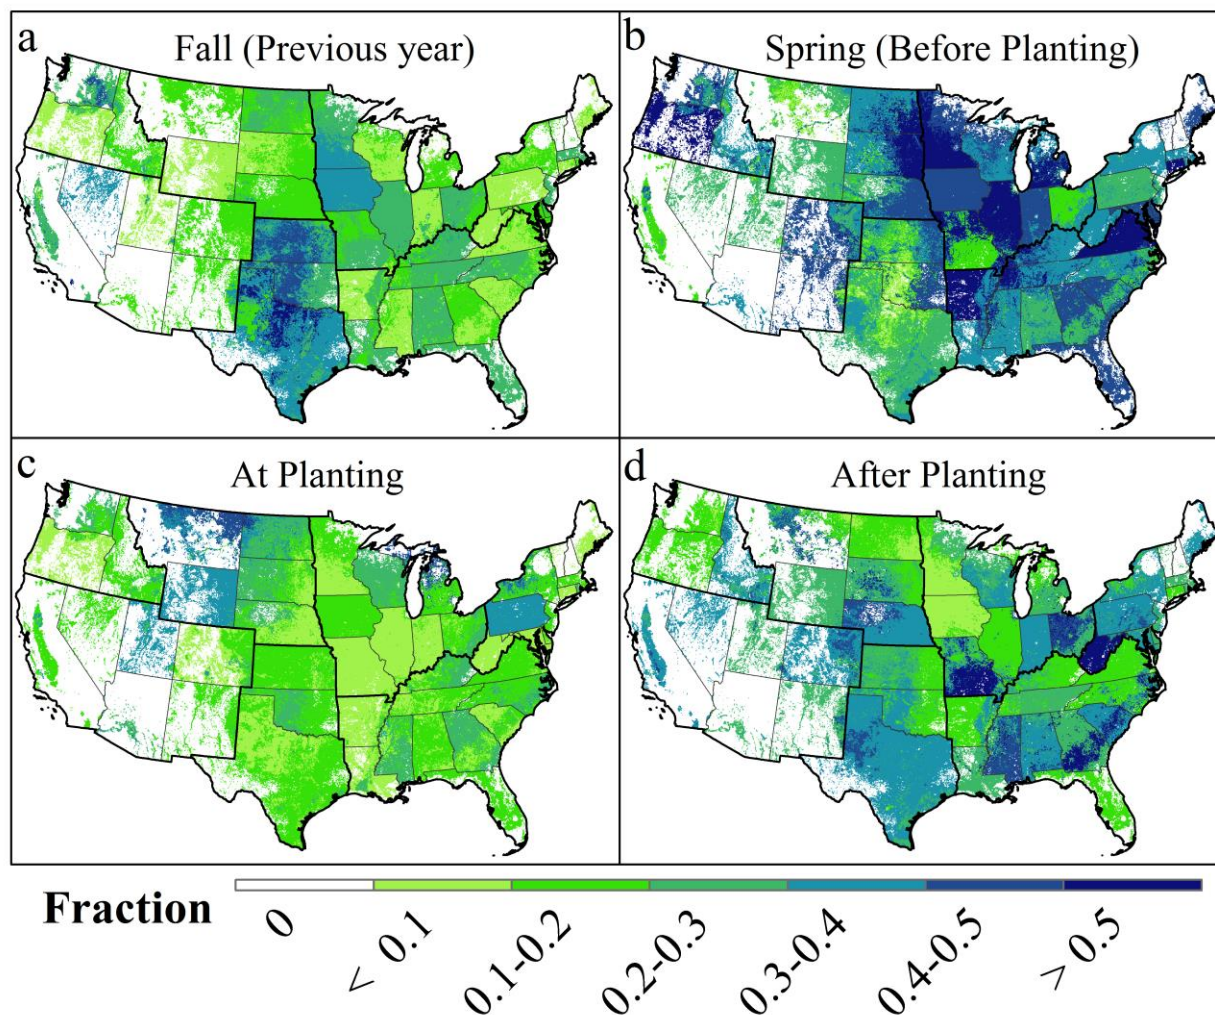

Supplementary figure S2. The fraction of N use rate at four timings to total N use rate in 2015. a, Fall (previous year); b, Spring (before planting); c, At planting; d, After planting.

## 10 Spatial distribution of N fertilizer use rate in 1997

We compared the spatial distribution of N use rate in 1997 between Ruddy et al. (2006) and our map (Figure S3). Ruddy et al. (2006) used top-down approach to obtain the N use rate by dividing the total county-level N consumption by agricultural area within the county. While we adopted the bottom-up approach to generate the N use rate based on the state-level crop-specific N use rate and cropland distribution map developed by Yu and Lu (2017).

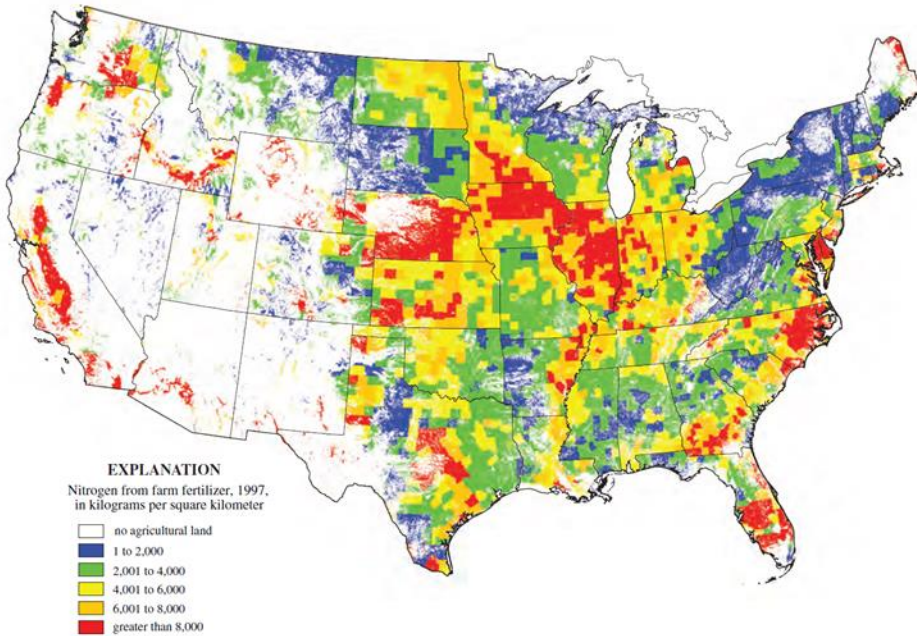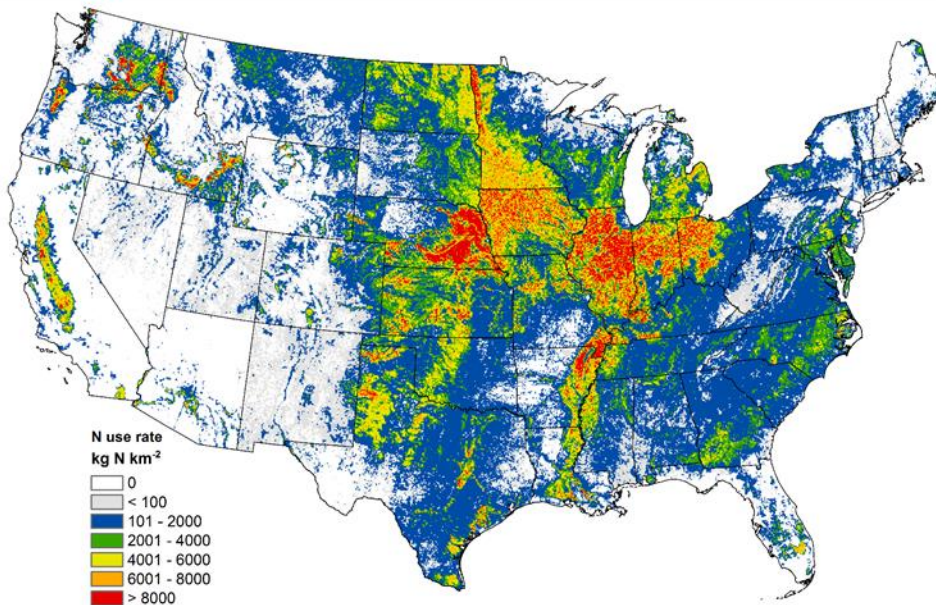

Supplementary figure S3. N fertilizer application rate across the contiguous U.S in 1997. (a) Ruddy et al. (2006); (b) this study

## 11 Temporal ratio of the consumption of 11 single N fertilizers to national total

We calculated the temporal change of the ratio of 11 N fertilizers to the national N consumption (Figure S4). Generally, the ratios were below 50% before 1950, and increased rapidly to above 85% after 1980. The rest of percentage represents small fraction of other single N fertilizers and large

fraction of mixed N fertilizers used. Due to a lack of data and the difficulty in accounting N content in mixed N fertilizers, we adopted the 11 major single N fertilizers to estimate the  $\text{NH}_4^+$ -N and  $\text{NO}_3^-$ -N fraction of historical N fertilizer use in each state.

However, according to Mehring et al. (1946), ammonium N accounted for only 2% of mixed fertilizer N in 1900 but gradually rose to 72% of mixed N fertilizer from 1925 to 1944. Therefore, we might overestimate the  $\text{NH}_4^+$ -N fraction before 1925 while underestimate the fraction after 1925.

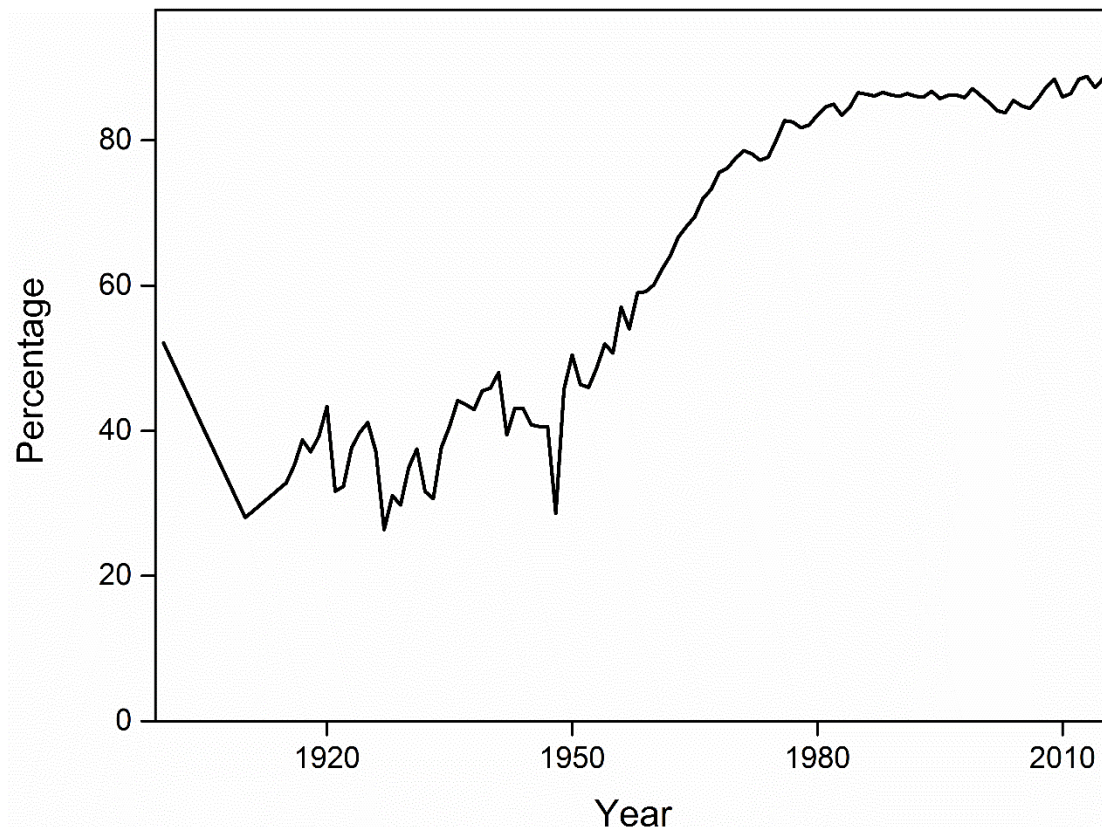

Supplementary figure S4. Temporal percentage of 11 N fertilizers to total N consumption.

## Reference

- Association of American Plant Food Control Officials (AAPFCO): Commercial Fertilizers (1986, 1996, 2006, 2012), available at: <http://www.aapfco.org/publications.html>, last access: 19 November 2017, 2017.
- Bierman, P. M., Rosen, C. J., Venterea, R. T., and Lamb, J. A.: Survey of nitrogen fertilizer use on corn in Minnesota, *Agr. Syst.*, 109, 43-52, 2012.



- Brakebill, J. W. and Gronberg, J. M.: County-Level Estimates of Nitrogen and Phosphorus from Commercial Fertilizer for the Conterminous United States, 1987-2012, U.S. Geological Survey data release, Available at: <https://doi.org/10.5066/F7H41PKX>, last access: 19 October 2017, 2017.
- Dinnes, D. L., Karlen, D. L., Jaynes, D. B., Kaspar, T. C., Hatfield, J. L., Colvin, T. S., and Cambardella, C. A.: Nitrogen management strategies to reduce nitrate leaching in tile-drained midwestern soils, *Agron. J.*, 94, 153-171, 2002.
- FAO (Food and Agriculture Organization of the United Nations): FAO online database, available at: <http://www.fao.org/faostat/en/#data/RF>, last access: 19 October 2017, 2017.
- Ibach, D. B. and Adams, J. R.: Fertilizer Use in the United States by Crops and Areas, 1964 Estimates, USDA-Economic Research Service and Statistical Reporting Service, Statistical Bulletin No. 408, Washington, D. C., 1967.
- Ibach, D. B., Adams, J. R., and Fox, E. I.: Commercial Fertilizer Used on Crops and Pasture in the United States, 1959 Estimates, USDA-Economic Research Service and Agricultural Research Service, Statistical Bulletin No. 348, Washington, D. C., 1964.
- Mahler, R. L., Koehler, F. E., and Lutcher, L. K.: Nitrogen Source, Timing of Application, and Placement: Effects on Winter Wheat Production, *Agron. J.*, 86, 637-642, 1994.
- Mehring, A. L., Adams, J. R., and Jacob, K. D.: Statistics on Fertilizers and Liming Materials in the United States, USDA-Agricultural Research Service, Statistical Bulletin No. 191, Washington, DC, 1957.
- Mehring, A. L., Wallace, H. M., and Drain, M.: Consumption and trends in the use of fertilizer in the year ended June 30, 1944, USDA, Washington, DC, 1946.
- Mengel, D.B.: Types and Uses of Nitrogen Fertilizers for Crop Production, available at: <https://www.extension.purdue.edu/extmedia/AY/AY-204.html>, last access: 19 November 2017, 2017.
- Ruddy, B. C., Lorenz, D. L., and Mueller, D. K.: County-level estimates of nutrient inputs to the land surface of the conterminous United States, 1982–2001, USGS Scientific Investigations Report 2006–5012, 17 pp., available at: <http://pubs.usgs.gov/sir/2006/5012/>, last access: 19 November 2017, 2006.
- Sheridan, R. C.: Chemical fertilizers in southern agriculture, *Agr. Hist.*, 53, 308-318, 1979.
- USDA (U.S. Department of Agriculture): Fertilizer Used on Crops and Pasture in the United States, 1954 Estimates, USDA-Agricultural Research Service, Statistical Bulletin No. 216, Washington, D. C., 1957.
- USDA (U.S. Department of Agriculture): Consumption of Commercial Fertilizers and Primary Plant Nutrients in the United States, 1850-1964, and by STATES, 1945-64, USDA-Statistical Reporting Service, Crop Reporting Board, Statistical Bulletin No. 375, Washington, D. C., 1966.
- USDA (U.S. Department of Agriculture): Consumption of Commercial Fertilizers, Primary Plant Nutrients, and Micronutrients, 1850-1969, USDA-Statistical Reporting Service, Crop Reporting Board, Statistical Bulletin No. 472, Washington, D. C., 1971.
- USDA (U.S. Department of Agriculture): Commercial fertilizers consumption for year ended June

30, USDA-Statistical Reporting Service, Crop Reporting Board, Washington, D. C., 1977

USDA-ERS (U.S. Department of Agriculture-Economic Research Service): Fertilizer Use and Price, available at: <https://www.ers.usda.gov/data-products/arms-farm-financial-and-crop-production-practices/>, last access: 19 November 2017, 2013.

USDA-ERS (U.S. Department of Agriculture-Economic Research Service): Tailored Reports: Crop Production Practices, available at: <https://www.ers.usda.gov/data-products/fertilizer-use-and-price/>, last access: 19 November 2017, 2016.

USDA-NASS (U.S. Department of Agriculture-National Agricultural Statistics Service): Agricultural Chemical Use Program, available at: [https://www.nass.usda.gov/Surveys/Guide\\_to\\_NASS\\_Surveys/Chemical\\_Use/index.php](https://www.nass.usda.gov/Surveys/Guide_to_NASS_Surveys/Chemical_Use/index.php), last access: 19 November 2017, 2017.

Wade, T., Claassen, R., and Wallander, S.: Conservation-practice adoption rates vary widely by crop and region, U.S. Department of Agriculture-Economic Research Service, EIB-147, available at: <https://www.ers.usda.gov/publications/pub-details/?pubid=44030>, last access: 19 November 2017, 2015.

Yu, Z. and Lu, C. Q.: Historical cropland expansion and abandonment in the continental U.S. during 1850 to 2015, Glob. Ecol. Biogeogr., In press.
